# Supplementary material for: Mesoporous 3D ZnO–NiO architectures for high-performance supercapacitor electrode materials
Source: Royal Society of Chemistry journal article supplement (doi:10.1039/c3ce42567c), 2014-01-01
Supplement: c3ce42567c1.pdf [file c3ce42567c1.pdf]

## Electronic Supplementary Information (ESI)

### Mesoporous 3D ZnO-NiO architectures for high-performance supercapacitor electrode materials

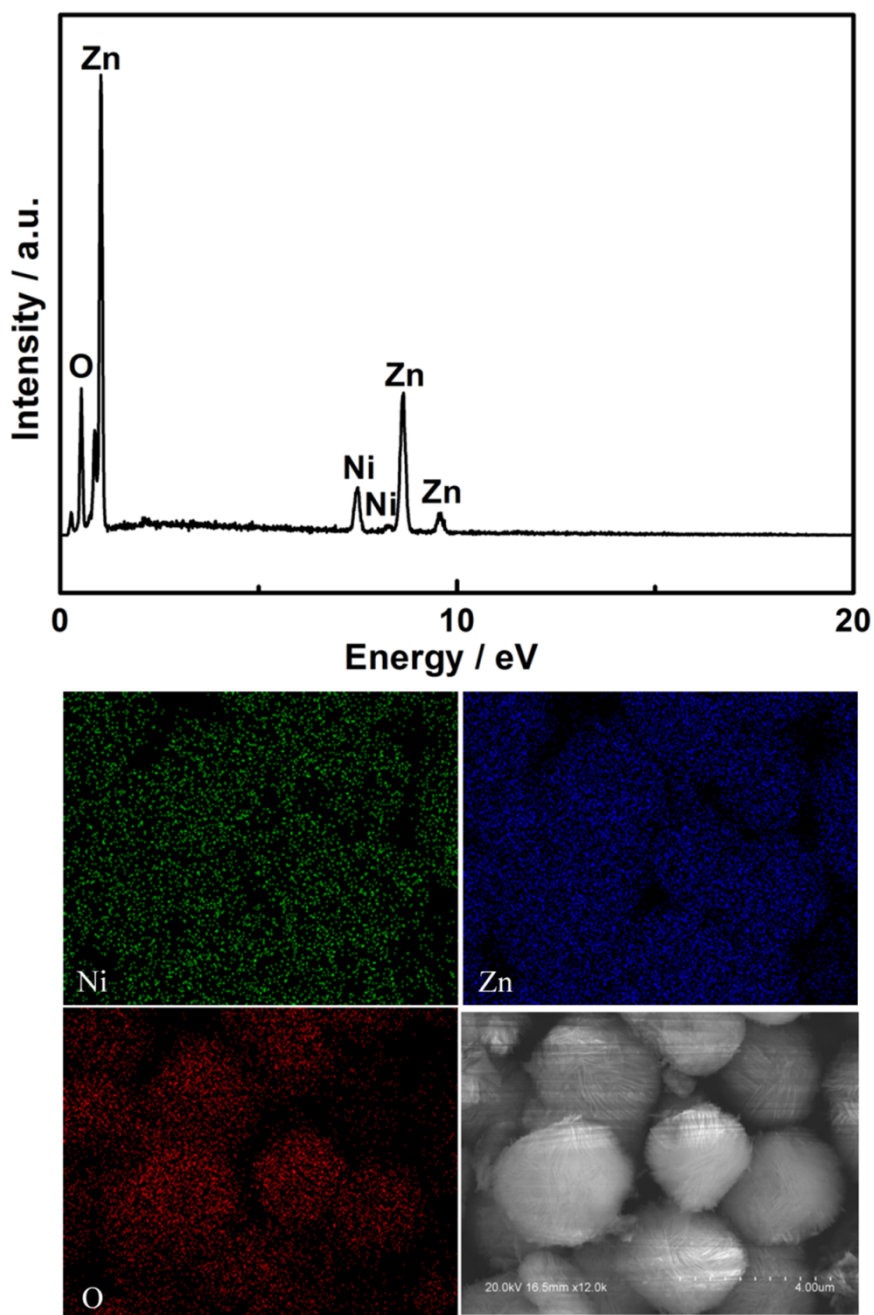

Fig. S1 EDS spectra measurements of P1.

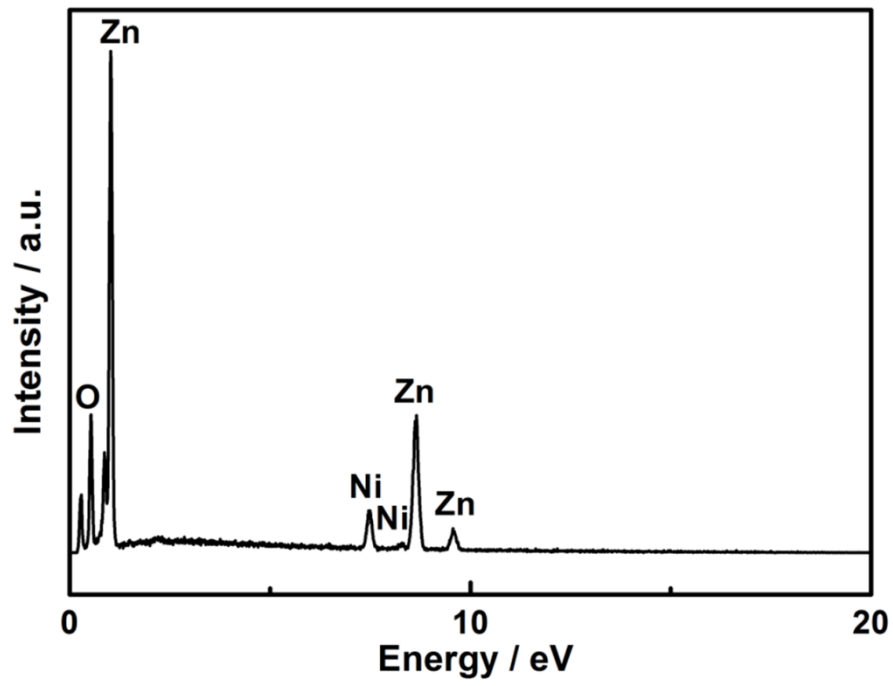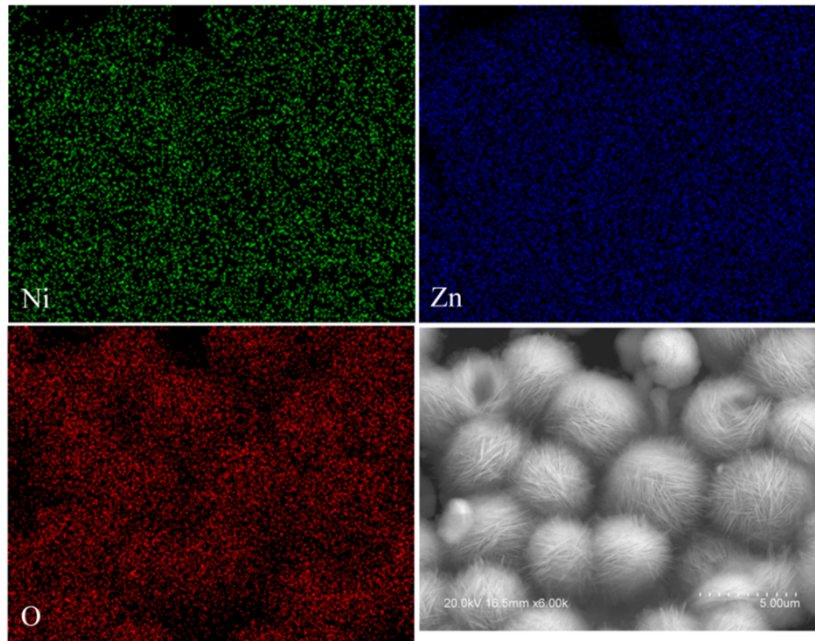

Fig. S2 EDS spectra measurements of P2.

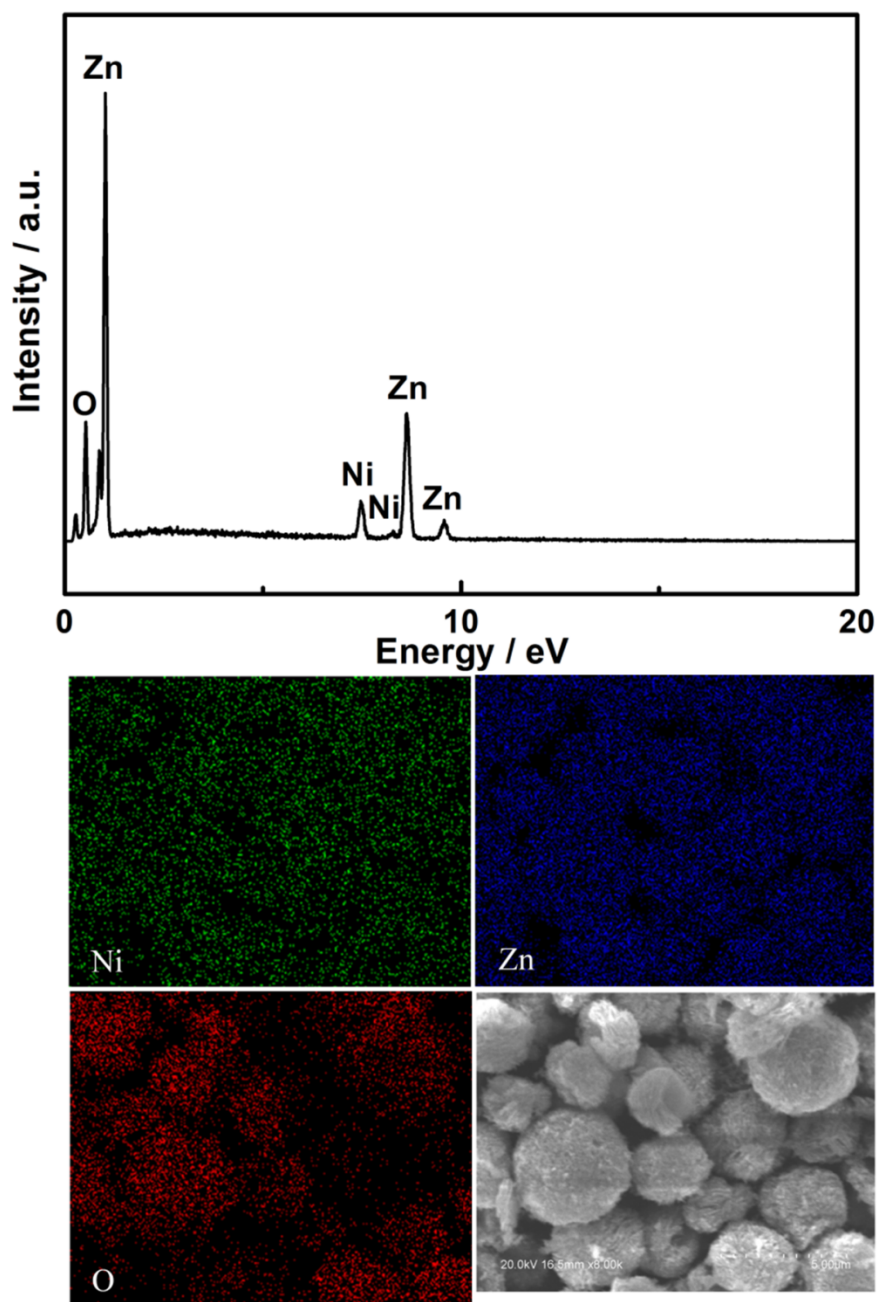

Fig. S3 EDS spectra measurements of P3.
